# Supplementary material for: Nature and Potential Impact of Alcohol Health Warning Labels: A Scoping Review
Source: MDPI journal article supplement (doi:10.3390/nu13093065), 2021-08-31
Supplement: s1 [file s1]

Table S1: Label development, content and format

|                           | Label content                                                                                                                                                                                                                                                                                                              |                                   | Label format                                                                                                                                                                                                              | How was label developed                                                                                           | How presented                                  | Duration of presentation | Alcohol type                                                  | Language of warning |
|---------------------------|----------------------------------------------------------------------------------------------------------------------------------------------------------------------------------------------------------------------------------------------------------------------------------------------------------------------------|-----------------------------------|---------------------------------------------------------------------------------------------------------------------------------------------------------------------------------------------------------------------------|-------------------------------------------------------------------------------------------------------------------|------------------------------------------------|--------------------------|---------------------------------------------------------------|---------------------|
|                           | Text                                                                                                                                                                                                                                                                                                                       | Image                             |                                                                                                                                                                                                                           |                                                                                                                   |                                                |                          |                                                               |                     |
| Al-Hamdani & Smith (2015) | Heavy drinking causes liver cancer. Your chances for a 5-year survival from the disease are 3% when caught in its late stages                                                                                                                                                                                              | Liver cancer (diseased image)     | Depending on condition:<br>Text: occupying 25% of the front body area<br>Text and image: 50% of the front body area<br>Plain package: 50% of the front body area, removed brand imagery items and using standardized font | Developed by researchers, based on tobacco health warnings literature                                             | Picture of label on the bottle                 | Very short               | Beer, wine and hard liquor                                    | English             |
| Al-Hamdani & Smith (2017) | Heavy drinking causes liver cancer. Your chances for a 5-year survival from the disease are 3% when caught in its late stages                                                                                                                                                                                              | Liver cancer (diseased image)     | Depending on condition: occupying 50, 75% or 90% of front body area<br>Plain package: removed brand imagery items and using standardized font                                                                             | Developed by researchers, not explicitly mentioned how                                                            | Picture of label on the bottle (on the screen) | Very short               | Beer, wine and hard liquor                                    | English             |
| Annunziata et al (2019)   | Each alcoholic beverage damages your brain (long term effect)<br><br>For your safety, don't drink and drive (short term effect)                                                                                                                                                                                            | Congruent pictorial               | Logo position: back or front<br>Logo size: big or small                                                                                                                                                                   | Developed by researchers, based on others' previous research                                                      | Image of bottle with label (on the screen)     | Very short               | Wine                                                          | Italian, French     |
| Blackwell et al (2018)    | Alcohol increases your risk of cancer/mental illness (general, negative)<br>Drinking less reduces your risk of cancer/mental illness (general, positive)<br>Alcohol increases your risk of bowel cancer/depression (specific, negative)<br>Drinking less reduces your risk of bowel cancer/depression (specific, positive) | /                                 | Black text on white background                                                                                                                                                                                            | Developed by researchers, Based on own and others' previous alcohol HWL research                                  | Image of label on the bottle (on the screen)   | Very short               | Beer                                                          | English             |
| Clarke et al (2021a)      | Alcohol causes bowel cancer<br>Alcohol causes breast cancer<br>Alcohol causes liver cancer                                                                                                                                                                                                                                 | Realistic photo of diseased organ | Black text on white background with black border, rotating messages                                                                                                                                                       | Developed by researchers, based on alcohol harm research, labelling research, and own previous labelling research | Picture of label on the bottle (on the screen) | Very short               | Depending on previously established preference (beer or wine) | English             |

|                                |                                                                                                                                                                                                                                                                                                                                                                                                                             |                                                     |                                                                                        |                                                                                                            |                                                                 |                                                            |                                                                                                                        |                    |
|--------------------------------|-----------------------------------------------------------------------------------------------------------------------------------------------------------------------------------------------------------------------------------------------------------------------------------------------------------------------------------------------------------------------------------------------------------------------------|-----------------------------------------------------|----------------------------------------------------------------------------------------|------------------------------------------------------------------------------------------------------------|-----------------------------------------------------------------|------------------------------------------------------------|------------------------------------------------------------------------------------------------------------------------|--------------------|
| Clarke et al (2021b)           | Alcohol causes bowel cancer<br>Alcohol causes breast cancer<br>Alcohol causes liver cancer<br>Alcohol causes liver cirrhosis<br>Alcohol causes heart disease                                                                                                                                                                                                                                                                | Realistic photo of diseased organ                   | Black text on white background with black border, rotating messages                    | Developed by researchers, based on previous alcohol HWL research                                           | Labels on products in the lab store                             | Very short                                                 | All drinks for the shopping,<br><br>Post-shopping survey: beer or wine, depending on previously established preference | English            |
| Glock & Krolak-Schwerdt (2013) | Health-related:<br>Alcohol damages your brain<br>Alcohol endangers your health,<br>Alcohol damages your cardiovascular system,<br>Alcohol damages your liver,<br>Alcohol drinking is highly addictive<br><br>Positive expectancies:<br>Alcohol reduces your capacity,<br>Alcohol does not reduce your tension,<br>Alcohol leads to problems with other people,<br>Alcohol increases stress,<br>Alcohol makes you feel alone | /                                                   | Front of pack, large font                                                              | Developed by researchers, on previous positive expectancy research                                         | Picture of label on the bottle (on the screen)                  | Very short                                                 | Wine                                                                                                                   | German             |
| Gold et al (2020)              | Warning: Alcohol causes cancer                                                                                                                                                                                                                                                                                                                                                                                              | /                                                   | In bold type – black text on white background, with red border                         | Not mentioned                                                                                              | Picture of the label next to the bottle (on the screen)         | Very short                                                 | Beer, wine and spirits                                                                                                 | English            |
| Hall et al (2019)              | WARNING: Drinking alcohol [causal language variant] liver disease                                                                                                                                                                                                                                                                                                                                                           | /                                                   | Not mentioned                                                                          | Developed by researchers, Based on alcohol harm research                                                   | Picture of the label (on the screen)                            | Very short                                                 | Beer                                                                                                                   |                    |
| Hall et al (2020)              | WARNING: Drinking alcohol causes liver disease<br><br>Efficacy information - Cut back: <a href="http://www.cutback.gov">www.cutback.gov</a>                                                                                                                                                                                                                                                                                 | Copyright-free images depicting diseased body parts | White text on black background, size depending on condition                            | Developed by researchers, based on alcohol harm research                                                   | Picture of the label on the bottle – mock brand (on the screen) | Very short                                                 | Beer                                                                                                                   | English            |
| Hobin et al (2020a)            | Alcohol can cause cancer, including breast and colon cancers<br><br>(additionally: national drinking guidelines and standard drinks contained in the bottle)                                                                                                                                                                                                                                                                | /                                                   | Large, bright yellow background and red border, rotating messages, pre-determined size | Developed by researchers and in consultation with stakeholders, based on own and others' previous research | Label stickers on the bottle in the store                       | One month cancer label, additional 3,5 months other labels | All except select local and single serve beer and cider                                                                | English and French |

|                           |                                                                                                                                                                                                                                                                                                                        |                             |                                                                                                                                                                                                                                                                   |                                                                                                            |                                                |                                                            |                                                                             |                    |
|---------------------------|------------------------------------------------------------------------------------------------------------------------------------------------------------------------------------------------------------------------------------------------------------------------------------------------------------------------|-----------------------------|-------------------------------------------------------------------------------------------------------------------------------------------------------------------------------------------------------------------------------------------------------------------|------------------------------------------------------------------------------------------------------------|------------------------------------------------|------------------------------------------------------------|-----------------------------------------------------------------------------|--------------------|
| Hobin et al (2020c)       | Alcohol can cause cancer, including breast and colon cancers<br><br>(additionally: drinking guidelines and standard drinks contained in the bottle)                                                                                                                                                                    | /                           | Large, bright yellow background and red border, rotating messages, pre-determined size                                                                                                                                                                            | Developed by researchers and in consultation with stakeholders, based on own and others' previous research | Label stickers on the bottle in the store      | One month cancer label, additional 3,5 months other labels | All except select local and single serve beer and cider                     | English and French |
| Hobin et al (2020b)       | Alcohol can cause cancer, including breast and colon cancers<br><br>(additionally: drinking guidelines and standard drinks contained in the bottle)                                                                                                                                                                    | /                           | Large, bright yellow background and red border, rotating messages, pre-determined size                                                                                                                                                                            | Developed by researchers and in consultation with stakeholders, based on own and others' previous research | Label stickers on the bottle in the store      | One month cancer label, additional 3,5 months other labels | All except select local and single serve beer and cider                     | English and French |
| Jarvis & Pettigrew (2013) | Keep your brain healthy (Positive)<br>Every drink of alcohol harms your brain (Negative)<br>Make sure you are okay to drive (Positive)<br>Drunk driving kills (Negative)                                                                                                                                               | /                           | No specific formatting                                                                                                                                                                                                                                            | Developed by researchers based on own qualitative research                                                 | Message next to brand name                     | Very short                                                 | Pre-mixed drinks                                                            | English            |
| Jongenelis et al (2018a)  | Alcohol increases your risk of bowel cancer<br>Alcohol increases your risk of breast, bowel, throat, and mouth cancer<br>Alcohol increases your risk of breast cancer<br>Warning: Alcohol increases your risk of cancer<br>Alcohol increases your risk of cancer<br>Reduce your drinking to reduce your risk of cancer | /                           | No specific formatting<br><br>Exposed to the statements via an advertisement in a newspaper, a warning on an alcohol product, a comment made by a child about information learned during a health class at school, on a billboard, in a message given by a doctor | Developed by researchers based on own multistage research                                                  | In a computer simulation (label on the bottle) | Very short                                                 | Depending on previously established preference (beer, wine, spirits/liquor) | English            |
| Jongenelis et al (2018b)  | Warning: Alcohol increases your risk of cancer<br>Warning: Alcohol increases your risk of diabetes<br>Warning: Alcohol increases your risk of liver damage<br>Warning: Alcohol increases your risk of mental illness<br>Warning: Alcohol increases your risk of heart disease                                          | /                           | No specific formatting                                                                                                                                                                                                                                            | Developed by researchers based on own multistage research                                                  | In a computer simulation (label on the bottle) | Very short                                                 | Depending on previously established preference (beer, wine, spirits/liquor) | English            |
| Krischler & Glock (2015)  | Question:<br>Do you really want alcohol to help you loosen your inhibitions?<br>Do you really want alcohol to help you meet new people?                                                                                                                                                                                | Photos associated with text | Black text on white background                                                                                                                                                                                                                                    | Developed by researchers based on own research                                                             | label on the bottle (in the lab)               | Very short                                                 | Beer and alcopops                                                           | German             |

|                          |                                                                                                                                                                                                                                                                                                                                                                                             |                                                                                                     |                                                      |                                                                                                                          |                                                   |            |                                                |         |
|--------------------------|---------------------------------------------------------------------------------------------------------------------------------------------------------------------------------------------------------------------------------------------------------------------------------------------------------------------------------------------------------------------------------------------|-----------------------------------------------------------------------------------------------------|------------------------------------------------------|--------------------------------------------------------------------------------------------------------------------------|---------------------------------------------------|------------|------------------------------------------------|---------|
|                          | <p>Do you really want alcohol to help you test your limits?</p> <p>Statement:<br/> Yes, alcohol helps loosen your inhibitions<br/> Yes, alcohol helps you meet new people<br/> Yes, alcohol helps you test your limits</p>                                                                                                                                                                  |                                                                                                     |                                                      |                                                                                                                          |                                                   |            |                                                |         |
| Ma (2021)                | <p>Narrative:<br/> Alcohol gave me bowel cancer<br/> Alcohol gave me liver cancer</p> <p>Non-narrative:<br/> Alcohol causes bowel cancer<br/> Alcohol causes liver cancer</p>                                                                                                                                                                                                               | <p>Narrative PWL:<br/> cancer patient photo</p> <p>Non-narrative:<br/> diseased body part image</p> | Black text on white background, large part of bottle | Developed by researchers based on others' research                                                                       | Image of label on the bottle (on the screen)      | Very short | Beer and wine                                  | English |
| Monk et al (2017)        | 50 warnings in total (e.g, alcohol affects brain functioning and alcohol causes liver disease)                                                                                                                                                                                                                                                                                              | Content congruent image; graphic (explicit medical images) or neutral (cartoon physiology)          | White square                                         | Developed by researchers based on others' labelling research                                                             | Image of label only (on the screen)               | Very short | None (label only)                              | English |
| Morgenstern et al (2021) | Alcohol may harm the unborn baby<br>Alcohol can cause liver cirrhosis<br>Alcohol can cause mental health problems<br>Alcohol can cause dependence<br>Alcohol can cause cancer<br>Don't drink when taking medicine<br>Alcohol may harm the unborn baby<br>Alcohol slows your reaction time – don't drink and drive<br>Don't serve alcohol to minors<br>Don't drink while operating machinery | Congruent images                                                                                    | Red text on white background with red border         | Labels developed by NGO                                                                                                  | Image of label only (on the screen, on the paper) | Very short | None (label only)                              | German  |
| Pechey et al (2020)      | Alcohol causes liver cancer<br>Alcohol causes bowel cancer<br>Alcohol causes liver cirrhosis<br>Alcohol causes breast cancer<br>Alcohol causes liver disease<br>Alcohol causes 7 types of cancers<br>Alcohol causes heart disease                                                                                                                                                           | Graphic image depicting the health outcome described in the text                                    | Black text on white background with black border     | Developed by researchers based on previous research, evidence about designing effective messages, own piloting of images | Image of label on the screen                      | Very short | Beer or wine, depending on stated preference   | English |
| Pettigrew et al (2016)   | Alcohol increases your risk of bowel cancer<br>Warning: Alcohol increases your risk of cancer<br>Alcohol increases your risk of cancer                                                                                                                                                                                                                                                      | /                                                                                                   | Not mentioned                                        | Developed by researchers based on own research                                                                           | In a computer simulation (label on the bottle)    | Very short | Depending on previously established preference | English |

|                            |                                                                                                                                                                                                                          |                                                           |                                                                                                                                                                                                                |                                                                                                            |                                                                                    |                                                            |                                                         |                    |
|----------------------------|--------------------------------------------------------------------------------------------------------------------------------------------------------------------------------------------------------------------------|-----------------------------------------------------------|----------------------------------------------------------------------------------------------------------------------------------------------------------------------------------------------------------------|------------------------------------------------------------------------------------------------------------|------------------------------------------------------------------------------------|------------------------------------------------------------|---------------------------------------------------------|--------------------|
|                            | Alcohol increases your risk of breast, bowel, throat and mouth cancer<br>Alcohol increases your risk of breast cancer<br>Reduce your drinking to reduce your risk of cancer                                              |                                                           |                                                                                                                                                                                                                |                                                                                                            |                                                                                    |                                                            |                                                         |                    |
| Pham et al (2018)          | Drinkwise slogan: Get the facts:<br>Drinkwise.org.au                                                                                                                                                                     | Pregnancy pictogram                                       | Depending on condition: colour (use of red colouring instead of black); changing the size of the warning labels (increase of warning label size by 50%); changes in both colour and size of the warning labels | Enhancing existing voluntary labels based on theory                                                        | Study 1: Message on the screen<br><br>Study 2: Image of label only (on the screen) | Very short                                                 | 1st: None<br><br>2nd: wine                              | English            |
| Sillero-Rejon et al (2018) | Alcohol causes liver cirrhosis<br>Alcohol damages your brain<br>Alcohol is associated with depression and anxiety<br>Alcohol damages your unborn baby<br>Drinking alcohol causes road accidents<br>Alcohol causes cancer | Moderate or graphic (e.g. diseased organ) congruent image | White and red text on black background, bottom third of the bottle                                                                                                                                             | Developed by researchers, based on recommendations from other researchers and NGO                          | Image of branded can with label (on the screen)                                    | Very short                                                 | Beer                                                    | English            |
| Stafford & Salmon (2017)   | Alcohol causes fatal liver cancer                                                                                                                                                                                        | Diseased liver                                            | Front of pack, black text on white background with black border                                                                                                                                                | Based on design used in another study                                                                      | Label on the actual bottle in the lab                                              |                                                            | Alcopop                                                 | English            |
| Wigg & Stafford (2016)     | Alcohol causes fatal liver cancer                                                                                                                                                                                        | Diseased liver                                            | Front of pack, black text on white background with black border                                                                                                                                                | Developed by researchers, based on own preliminary study                                                   | Label on the actual bottle, foreign brand                                          | Very short                                                 | Beer and wine                                           | English            |
| Zhao et al (2020)          | Alcohol can cause cancer, including breast and colon cancers<br><br>(additionally: drinking guidelines and standard drinks contained in the bottle)                                                                      | /                                                         | Large, bright yellow background and red border, rotating messages, pre-determined size                                                                                                                         | Developed by researchers and in consultation with stakeholders, based on own and others' previous research | Label stickers on the bottle in the store                                          | One month cancer label, additional 3,5 months other labels | All except select local and single serve beer and cider | English and French |
